# Supplementary material for: Single event kinetic modeling for paraffin hydrocracking over an industrial Ni–W silica–aluminum catalyst
Source: Royal Society of Chemistry journal article supplement (doi:10.1039/d2re00286h), 2022-10-07
Supplement: d2re00286h1.pdf [file d2re00286h1.pdf]

Supplementary Information

**Single event kinetic modeling for paraffin hydrocracking  
over an industrial Ni-W silica-aluminum catalyst**

Jingjing Wang<sup>a,c</sup>, Kunpeng Song<sup>a,c</sup>, Hongwei Xiang<sup>a,b,c</sup>, Liping Zhou<sup>b,\*</sup>, Yong Yang<sup>a,b,c</sup>,

Yongwang Li<sup>a,b,c</sup>

<sup>a</sup> State Key Laboratory of Coal Conversion, Institute of Coal Chemistry, Chinese Academy of Sciences, Taiyuan 030001, PR China.

<sup>b</sup> National Energy Center for Coal to Liquids, Synfuels China Co., Ltd., Huairou District, Beijing 101400, PR China.

<sup>c</sup> University of Chinese Academy of Sciences, Beijing 100049, PR China.

\* Corresponding author.

E-mail address: zhouliping@synfuelschina.com.cn

## (1) The elimination of the external diffusion

The method of eliminating the external diffusion<sup>1</sup> is as following:

We checked the reactant conversion by varying the catalyst loading (1.55g and 2.33g, respectively), in which  $H_2/C_8$  ratio changed from 200 to 1000. The external diffusion experiments were performed at 654K (the highest temperature in the whole experimental points). The conversion of  $C_8$  was higher than 90% at this condition, and the conversion decreased slightly with the increasing  $H_2/C_8$  ratio. When the  $H_2/C_8$  ratio  $\geq 400$ , the two conversion lines overlapped (see in Fig. S1). We assumed that the influence of external diffusion could be eliminated at  $H_2/C_8$  ratio  $\geq 400$  and the kinetic experimental data were collected accordingly.

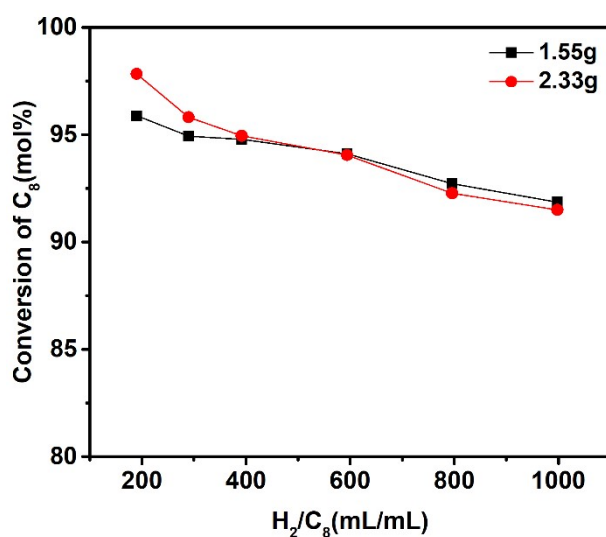

**Fig. S1.**  $C_8$  Conversion as a function of  $H_2/C_8$  ratio with two different catalyst loadings (reaction condition:  $T=654K$ ,  $p=5.0MPa$ ,  $LHSV=3.0h^{-1}$ )

## (2) The internal diffusion estimation

The internal diffusion limitation was checked by the Weisz–Prater criterion ( $C_{WP}$ ).<sup>2,3</sup>

$$C_{WP} = \frac{r_{obs} \rho_c R_p^2}{D_e C_s} < 1$$

Where  $r_{obs}$  = observed reaction rate, mol/kg cat./s

$\rho_c$  = density of the catalyst, kg/m<sup>3</sup>

$R_p$  = radius of the catalyst particle, m

$D_e$  = effective diffusivity, m<sup>2</sup>/s

$C_s$  = concentration of the component at the external surface of catalyst, mol/m<sup>3</sup>

$C_s$  was calculated in terms of the following equation:

$$C_s = C_0 = \frac{N_{oct}}{V} = \frac{P_{oct}}{RT}$$

Where  $P_{oct}$  = the pressure of n-octane, Pa

T = reaction temperature, K

R = universal gas constant, 8.314 J/mol/K

The effective diffusion coefficient  $D_e$  is calculated as following:

$$D_e = \frac{1}{\frac{1}{D_k} + \frac{1}{D_{AB}}}$$

$D_k$  is the Knudsen diffusivity, m<sup>2</sup>/s and  $D_{AB}$  is the molecular diffusivity, m<sup>2</sup>/s

$$D_k = \frac{\bar{v}l}{3}$$

$$D_{AB} = \frac{0.001T^{1.75} \left( \frac{1}{M_A} + \frac{1}{M_B} \right)^{0.5}}{(P / 0.101325) \left[ (\sum V)_A^{1/3} + (\sum V)_B^{1/3} \right]^2}$$

Where  $l$  = the pore diameter of the catalyst (6 nm, from BJH desorption branch).

$\bar{v}$  = the average velocity of the molecular, m/s

P = reaction pressure, MPa;

$(\sum V)_A$  and  $(\sum V)_B$  = molecular diffusion volumes of components A and B, cm<sup>3</sup>, respectively.<sup>4</sup>

$M_A$  and  $M_B$  = molecular weights of components A and B, respectively, g/mol.

Here, components A and B stand for H<sub>2</sub> and n-octane, respectively.

$D_{AB}$  and  $D_k$  are of the same magnitude by calculation, pore diffusion belongs to the transition zone diffusion.

The average velocity of the molecule can be calculated as following:

$$\bar{v} = \sqrt{\frac{8k_b T}{\pi m}} = \sqrt{\frac{8RT}{\pi M}}$$

Where M = The molecular weight of the molecule, kg/mol

In hydrocracking of n-octane, the maximum observed reaction rate is  $6.20 \times 10^{-3}$  mol/kg cat./s at reaction temperature 654K.

$$\rho_c = 950 \text{ kg/m}^3$$

$$R_p = 1.25 \times 10^{-4} \text{ m}$$

$$D_e = 5.3 \times 10^{-7} \text{ m}^2/\text{s}$$

$$C_s = 134.65 \text{ mol/m}^3$$

Therefore,  $C_{WP} = \frac{r_{obs} \rho_c R_p^2}{D_e C_s} = [(6.20 \times 10^{-3} \text{ mol/kg cat./s}) \times (950 \text{ kg/m}^3) \times (1.25 \times 10^{-4} \text{ m})^2] / [(5.3 \times 10^{-7} \text{ m}^2/\text{s}) \times 134.65 \text{ mol/m}^3] = 1.29 \times 10^{-3} \ll 1$

$C_{WP}$  value is far less than 1 at current experimental situations. The effect of internal diffusion is negligible.

### (3) $\beta$ -scission reaction of various carbenium ions

We obeyed the carbenium ion reaction principles developed over the last few decades in our computer-aided reaction network generation. The proposed  $\beta$ -scission mechanism suggested that linear paraffins may undergo several steps of isomerization until a configuration is attained that is favorable to  $\beta$ -scission.

As early as 1985, Planelles et.al. confirmed that the energy barrier in  $\beta$ -scission of a linear secondary carbenium ion (form a primary carbenium ion and an olefin species) was at least 50 kcal/mol, but the value of  $\beta$ -scission of a branched carbenium ion was only 30 kcal/mol.<sup>5</sup> Guillaume in IFP reported that the relative rate in  $\beta$ -scission of a linear secondary carbenium ion to form a primary carbenium ion is nearly 0, compared with the rates in forming secondary and tertiary carbenium ions by  $\beta$ -scission of branched carbenium ions.<sup>6</sup> Therefore, the linear secondary carbenium ions were not considered in  $\beta$ -scission, viz type D in Fig. S2. All the other possible mono-, di- and tri- branched carbenium ions were considered in  $\beta$ -scission, viz examples like type A, B and C Fig. S2.

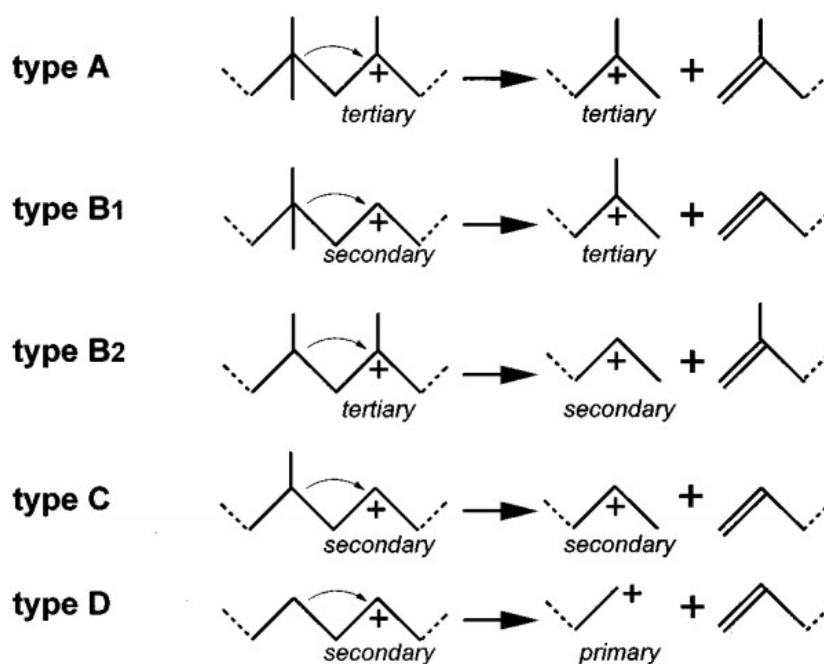

Fig. S2.  $\beta$ -scission of various carbenium ions

#### (4) Mass balance of the experimental points

The detailed experimental condition, conversion and mass balance information of the experimental data used for kinetic parameter estimation were listed in Table S1.

**Table S1.** Information of the experimental points used for parameter estimation

| Exp. points | T (K) | Pressure (MPa) | LHSV (h <sup>-1</sup> ) | Inlet C <sub>8</sub> (ml/h) | Inlet H <sub>2</sub> (ml/h) | H <sub>2</sub> /oil (v./v.) | Conv. (%) | Mass balance (%) |
|-------------|-------|----------------|-------------------------|-----------------------------|-----------------------------|-----------------------------|-----------|------------------|
| 1           | 573   | 5.0            | 3.0                     | 9.0                         | 7200.0                      | 800                         | 5.9       | 96               |
| 2           | 603   | 5.0            | 3.0                     | 9.0                         | 7200.0                      | 800                         | 17.9      | 96               |
| 3           | 611   | 5.0            | 3.0                     | 9.0                         | 7200.0                      | 800                         | 25.1      | 96               |
| 4           | 618   | 5.0            | 3.0                     | 9.0                         | 7200.0                      | 800                         | 29.3      | 97               |
| 5           | 627   | 5.0            | 3.0                     | 9.0                         | 7200.0                      | 800                         | 52.1      | 95               |
| 6           | 636   | 5.0            | 3.0                     | 9.0                         | 10800.0                     | 1200                        | 69.1      | 93               |
| 7           | 636   | 5.0            | 4.0                     | 12.0                        | 9600.0                      | 800                         | 55.1      | 98               |
| 8           | 636   | 5.0            | 3.0                     | 9.0                         | 7200.0                      | 800                         | 71.2      | 94               |
| 9           | 636   | 5.0            | 2.0                     | 6.0                         | 4800.0                      | 800                         | 82.2      | 96               |
| 10          | 636   | 5.0            | 1.0                     | 3.0                         | 2400.0                      | 800                         | 93.7      | 93               |
| 11          | 636   | 5.0            | 3.0                     | 9.0                         | 5400.0                      | 600                         | 72.4      | 96               |
| 12          | 636   | 5.0            | 3.0                     | 9.0                         | 3600.0                      | 400                         | 76.4      | 95               |
| 13          | 636   | 8.0            | 3.0                     | 9.0                         | 7200.0                      | 800                         | 58.6      | 98               |
| 14          | 636   | 6.5            | 3.0                     | 9.0                         | 7200.0                      | 800                         | 66.1      | 96               |
| 15          | 636   | 5.0            | 3.0                     | 9.0                         | 9000.0                      | 1000                        | 68.4      | 94               |
| 16          | 636   | 3.5            | 3.0                     | 9.0                         | 7200.0                      | 800                         | 78.5      | 96               |
| 17          | 636   | 2.0            | 3.0                     | 9.0                         | 7200.0                      | 800                         | 83.7      | 96               |
| 18          | 645   | 5.0            | 3.0                     | 9.0                         | 7200.0                      | 800                         | 84.5      | 94               |
| 19          | 654   | 5.0            | 3.0                     | 9.0                         | 10800.0                     | 1200                        | 89.8      | 90               |
| 20          | 654   | 5.0            | 3.0                     | 9.0                         | 9000.0                      | 1000                        | 91.5      | 92               |
| 21          | 654   | 5.0            | 3.0                     | 9.0                         | 7200.0                      | 800                         | 92.3      | 92               |
| 22          | 654   | 5.0            | 3.0                     | 9.0                         | 5400.0                      | 600                         | 94.1      | 88               |
| 23          | 654   | 5.0            | 3.0                     | 9.0                         | 3600.0                      | 400                         | 94.9      | 90               |

### (5) Peclet number calculation in fixed-bed reactor

The axial dispersion coefficient and dimensionless Peclet number in the tubular fixed-bed reactor were estimated in terms of the new empirical correlations developed by Rastegar and Gu, in which both molecular diffusion coefficient and bed voidage were considered in the axial dispersion coefficient estimation.<sup>7</sup> The bed-length-based Peclet number and the axial dispersion coefficient are as follows:

$$Pe_L = \frac{Lu}{\varepsilon_b D_b}$$

$$D_b = 0.7D_m + \frac{2R_p v \varepsilon_b}{0.18 + 0.008 \text{Re}^{0.59}}$$

Where  $\varepsilon_b$  = bed voidage;

L= length of the catalyst bed, m;

$R_p$  = catalyst particle radius, m;

u = superficial velocity at reaction conditions, m/s;

$D_b$  = axial dispersion coefficient, m<sup>2</sup>/s;

$D_m$  = molecular diffusivity, m<sup>2</sup>/s;

The Reynolds number is calculated as following:

$$\text{Re}_p = \frac{u d_p \rho}{(1-\varepsilon_b) \mu}$$

Where  $\rho$  = density of the fluid, kg/m<sup>3</sup>;

$d_p$  = catalyst particle diameter, m;

$\mu$  = viscosity of the fluid, Pa.s;

The molecular diffusion coefficient  $D_m$  can be determined by the following equations:

$$D_m = \frac{1}{3} \bar{v} \lambda$$

$$\bar{v} = \sqrt{\frac{8k_b T}{\pi m}} = \sqrt{\frac{8RT}{\pi M}}$$

$$\lambda = \frac{1}{\sqrt{2} \pi d^2 n} = \frac{RT}{\sqrt{2} \pi d^2 P N_A}$$

Where  $\bar{v}$  = the average velocity, m/s;

$\lambda$  = the mean free path in the gas phase;

M = the molecular weight of the species, kg/mol;

d = molecular dynamics diameter, e.g., octane with  $4.9 \times 10^{-10}$  m.<sup>8</sup>

P = reaction pressure, MPa;

In this study, the catalyst bed voidage  $\varepsilon_b$  is around 0.35, the catalyst bed length  $L$  is 30 mm, the catalyst particle diameter  $d_p$  is about 0.25 mm. The values of the Peclet number at current reaction conditions (the experimental points in Table S1) were estimated and the results were shown in Fig.S3. The values of the Peclet number at current conditions ranged from 113 to 162. We assumed that the flow regime at current situations could be approximately regarded as ideal plug flow.

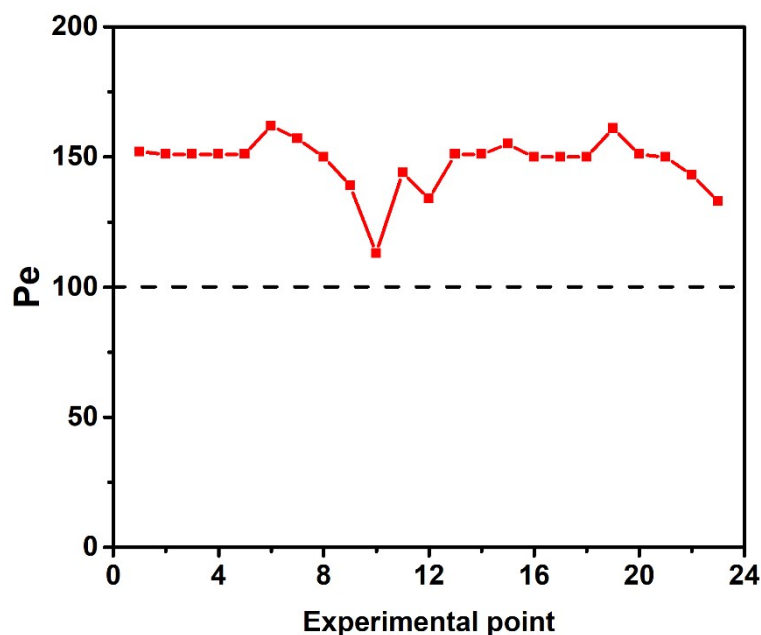

**Fig.S3** The values of the Peclet number at current reaction conditions

## Reference

1. C. Perego and S. Peratello, *Catal. Today*, 1999, **52**, 133-145.
2. Y. Wang, H.-H. Liu, S.-Y. Wang, M.-F. Luo and J.-Q. Lu, *J.Catal.*, 2014, **311**, 314-324.
3. W.-S. Lee, Z. Wang, R. J. Wu and A. Bhan, *J.Catal.*, 2014, **319**, 44-53.
4. E. N. Fuller, P. D. Schettler and J. C. Giddings, *Ind. Eng. Chem. Res.*, 1996, **58**, 18-27.
5. J. Planelles, J. Sánchez-Marin, F. Tomás and A. Corma, *J. Chem. Soc.*, 1985, 333-340.
6. D. Guillaume, *Ind. Eng. Chem. Res.*, 2006, **45**, 4554-4557.
7. S. O. Rastegar and T. Gu, *J. Chromatogr A*, 2017, **1490**, 133-137.
8. F. Jiménez-Cruz and G. C. Laredo, *Fuel*, 2004, **83**, 2183-2188.
